# Supplementary material for: Mitochondrial Dysregulation and Impaired Autophagy in iPSC-Derived Dopaminergic Neurons of Multiple System Atrophy
Source: PubMed Central journal article supplement — Stem Cell Reports. 2018 Oct 18;11(5):1185–98. doi: 10.1016/j.stemcr.2018.09.007 (PMC6234905; doi:10.1016/j.stemcr.2018.09.007), 2018-10-18
Supplement: mmc1.pdf [file mmc1.pdf]

**Supplemental Information**

**Mitochondrial Dysregulation and Impaired Autophagy in iPSC-Derived Dopaminergic Neurons of Multiple System Atrophy**

**Giacomo Monzio Compagnoni, Giulio Kleiner, Maura Samarani, Massimo Aureli, Gaia Faustini, Arianna Bellucci, Dario Ronchi, Andreina Bordoni, Manuela Garbellini, Sabrina Salani, Francesco Fortunato, Emanuele Frattini, Elena Abati, Christian Bergamini, Romana Fato, Silvia Tabano, Monica Miozzo, Giulia Serratto, Maria Passafaro, Michela Deleidi, Rosamaria Silipigni, Monica Nizzardo, Nereo Bresolin, Giacomo P. Comi, Stefania Corti, Catarina M. Quinzii, and Alessio Di Fonzo**

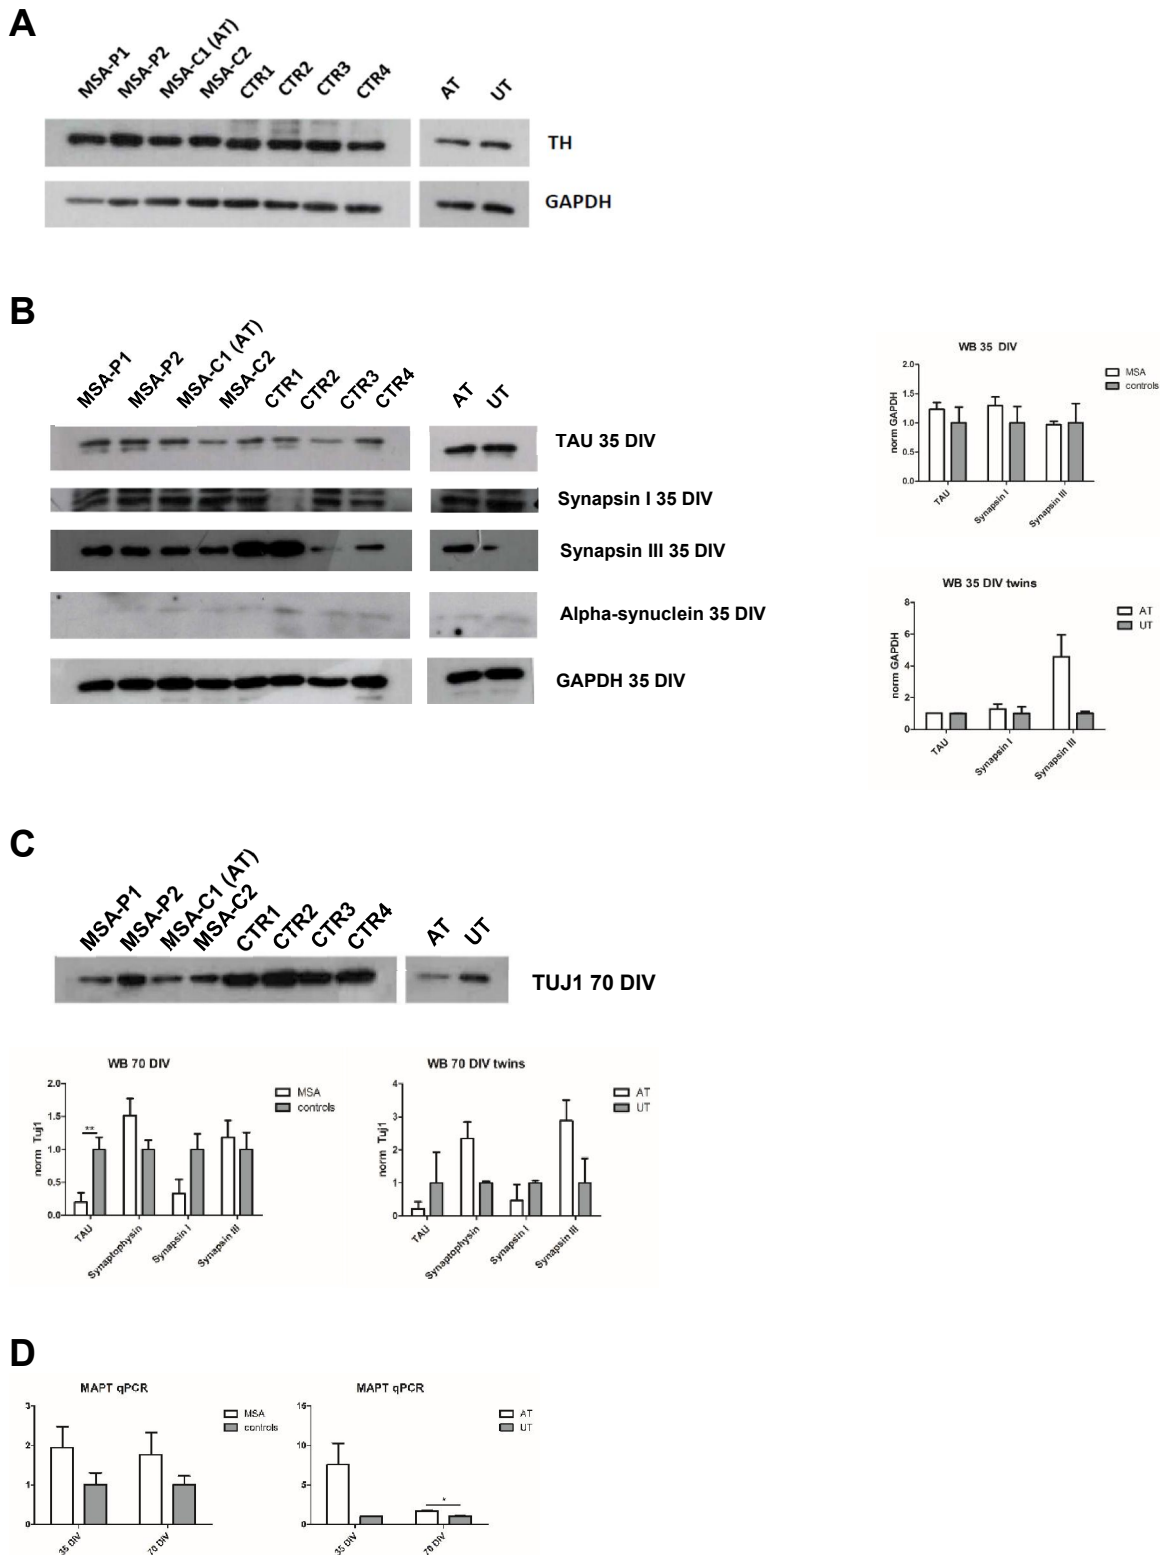

**A**

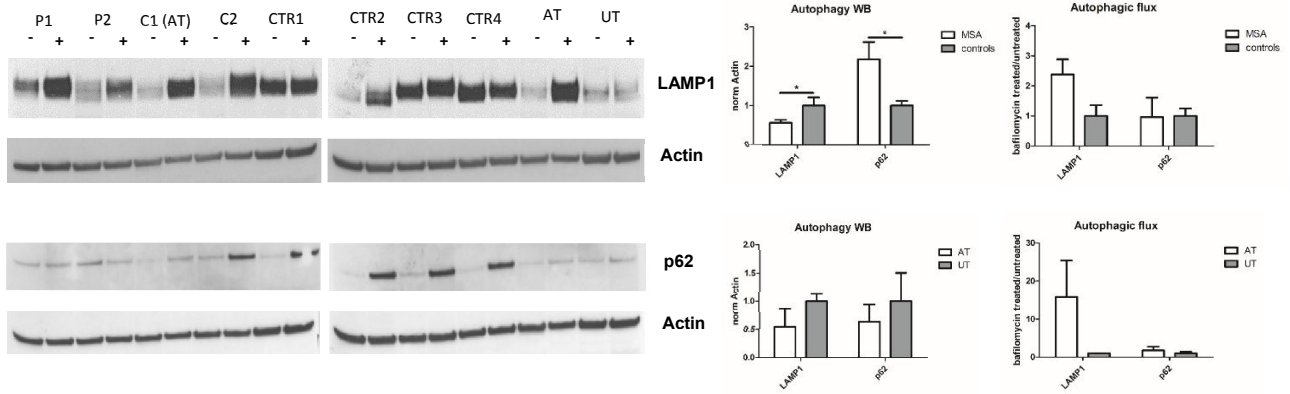

**B**

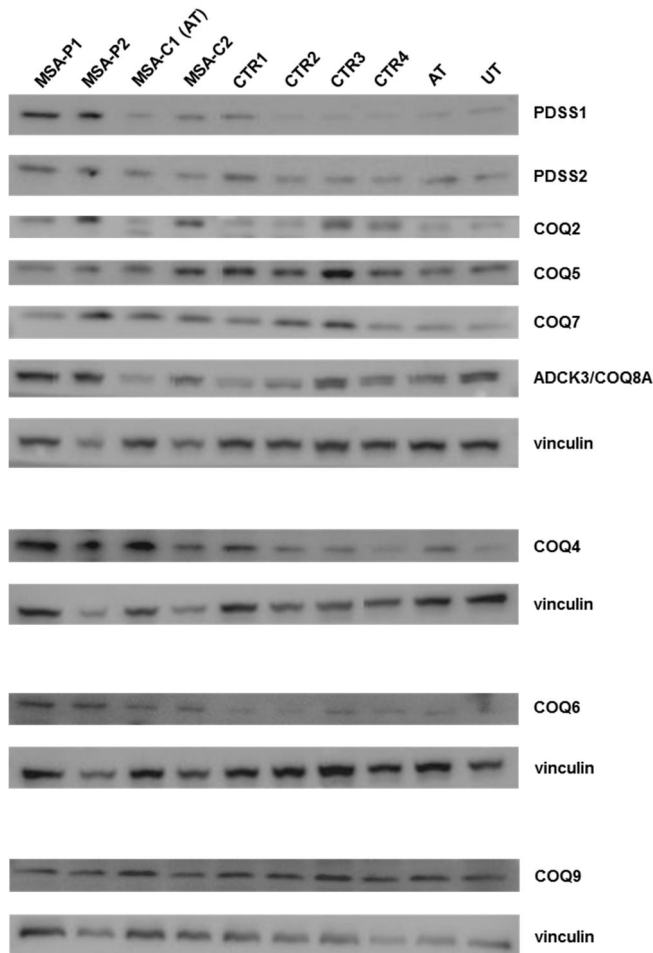

Figure S2. Related to Figures 5 and 6.

Autophagy and mitochondria in dopaminergic neurons. A) WB for LAMP1, p62 and Actin before (-) and after (+) treatment with bafilomycin (200 nM, 24 h) on iPSC-derived dopaminergic neurons at 35 DIV and graphs showing related quantifications at basal level and the autophagic flux. B) CoQ10 synthesis enzymes: WB for PDSS1, PDSS2, COQ2, COQ4, COQ5, COQ6, COQ7, ADCK3/COQ8A, COQ9 and Vinculin on iPSC-derived neurons at 35 DIV. AT=affected twin; UT=unaffected twin. Data are expressed as mean  $\pm$  s.e.m. \*= $p < 0.05$

### Autophagy Western Blot

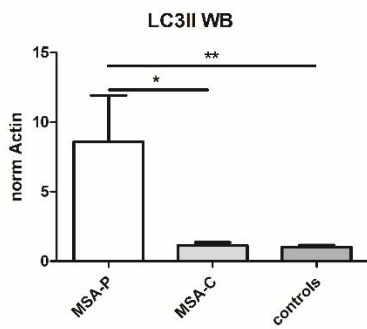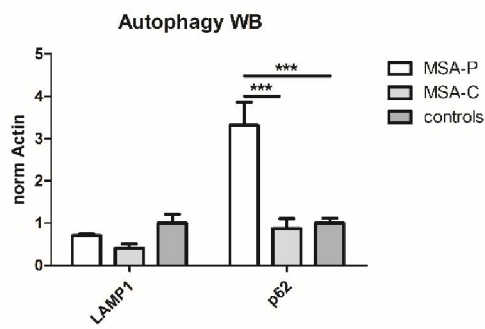

### Autophagic flux Western Blot

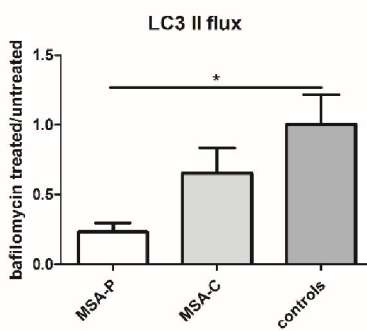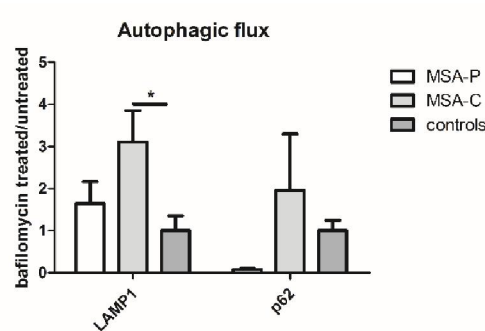

### Lysosomal enzymes activity

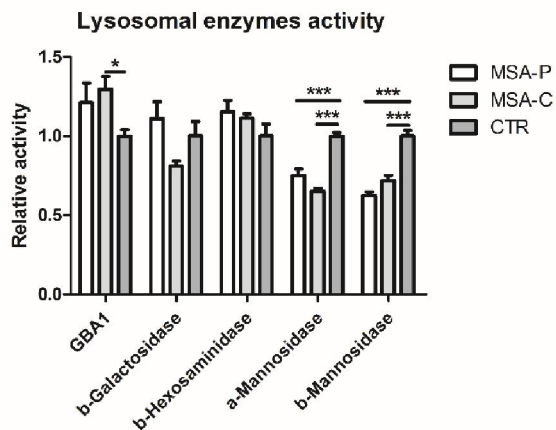

Figure S3. Related to Figure 5.

Graphs showing the results of autophagy-related experiments, separating MSA-P and MSA-C. Data are expressed as mean  $\pm$  s.e.m. \*= $p < 0.05$ ; \*\*= $p < 0.01$ ; \*\*\*= $p < 0.001$

## Respiratory chain activity

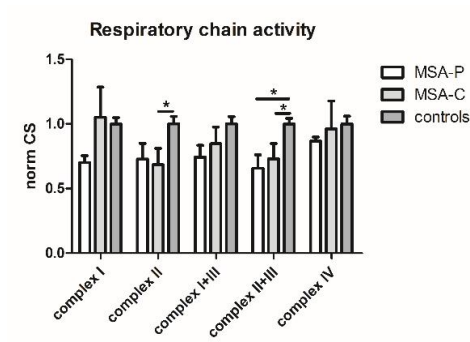

## TOMM20 WB

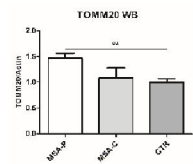

## mtDNA content

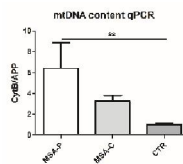

## Respiratory chain WB

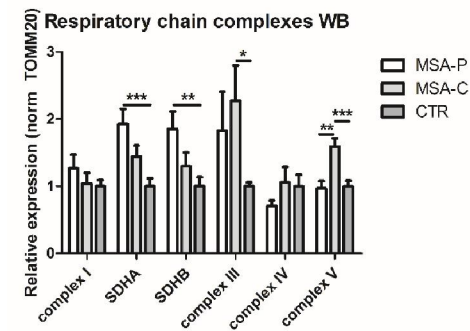

## CoQ10 dosage

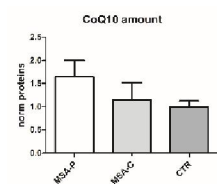

## CoQ10 biosynthesis enzymes WB

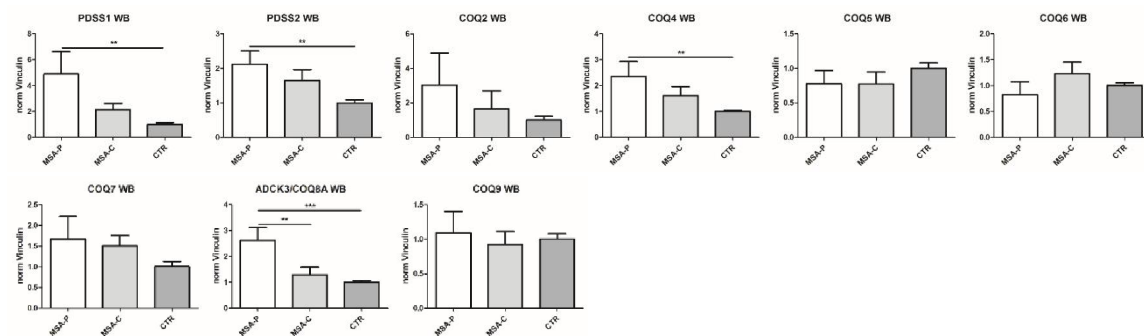

Figure S4. Related to Figure 6.

Graphs showing the results of mitochondria-related experiments, separating MSA-P and MSA-C. Data are expressed as mean  $\pm$  s.e.m. \* $p < 0.05$ ; \*\* $p < 0.01$ ; \*\*\* $p < 0.001$

## Autophagy WB

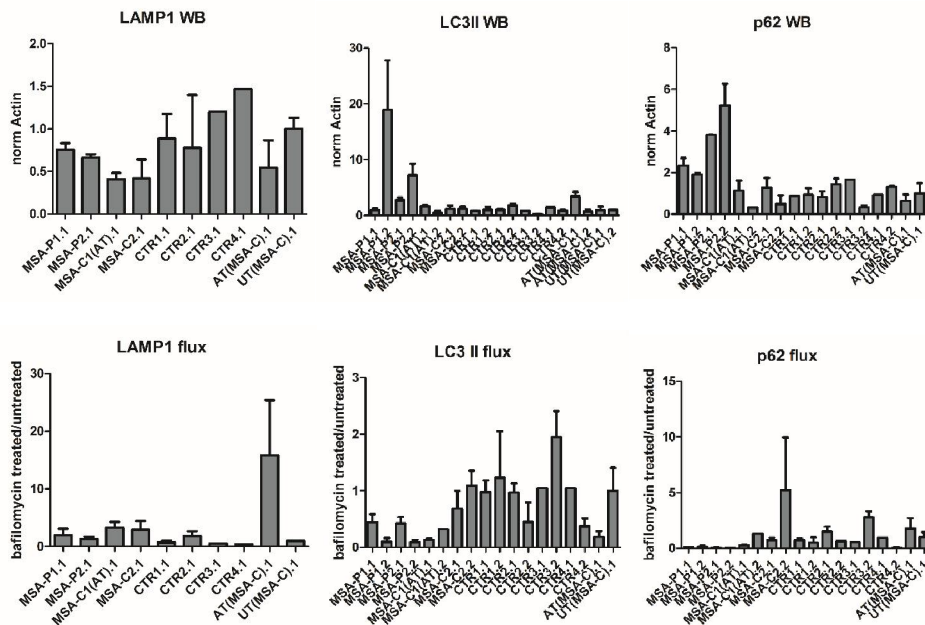

## Lysosomal enzymes activity

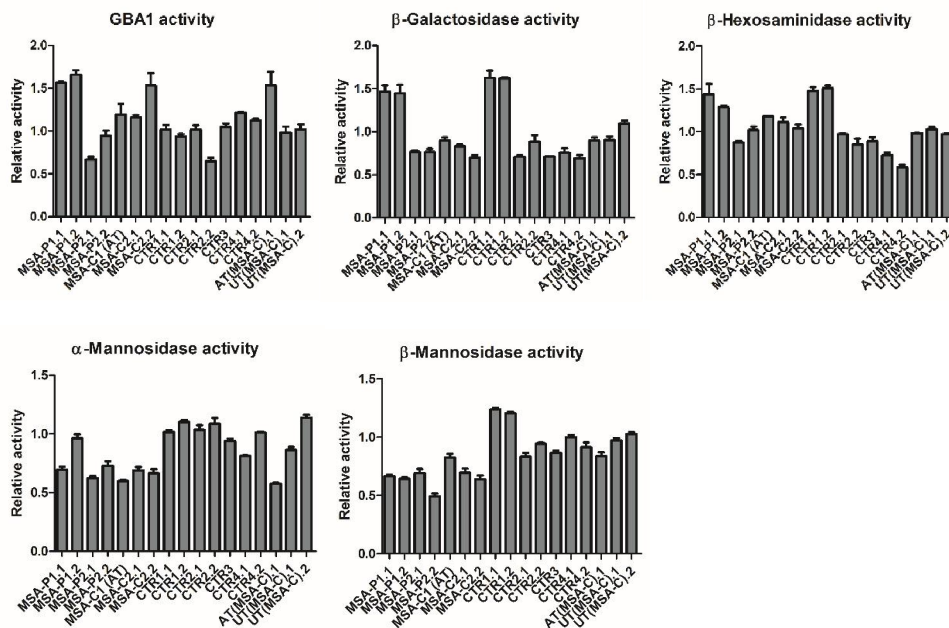

Figure S5. Related to Figure 5. Autophagy-related experiments, showing the results for each clone.

## Respiratory chain activity

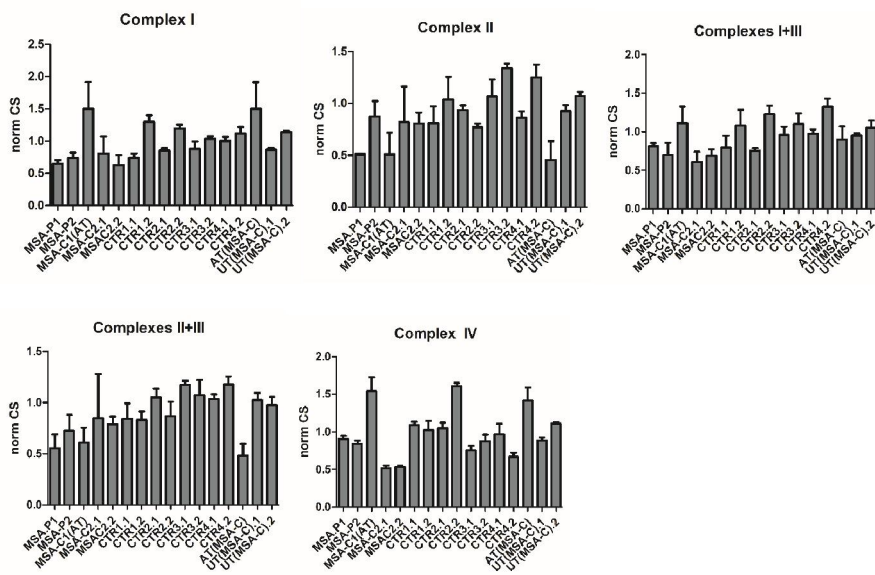

## Respiratory chain complexes WB

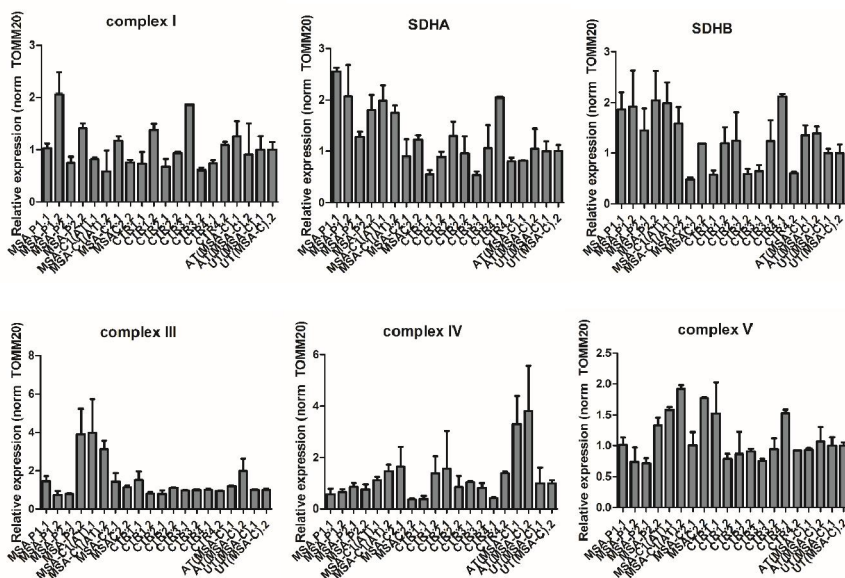

## TOMM20 WB

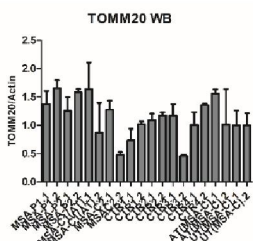

Figure S6. Related to Figure 6.

Mitochondria-related experiments (respiratory chain activity, respiratory chain complexes WB, TOMM20 WB), showing the results for each clone.

### mtDNA content

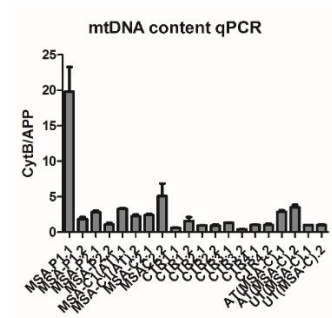

### CoQ10 amount

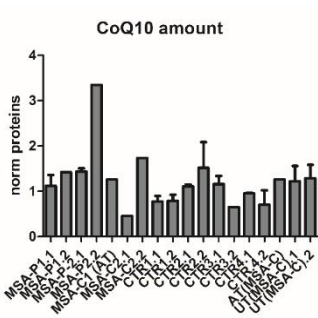

### CoQ10 biosynthesis enzymes WB

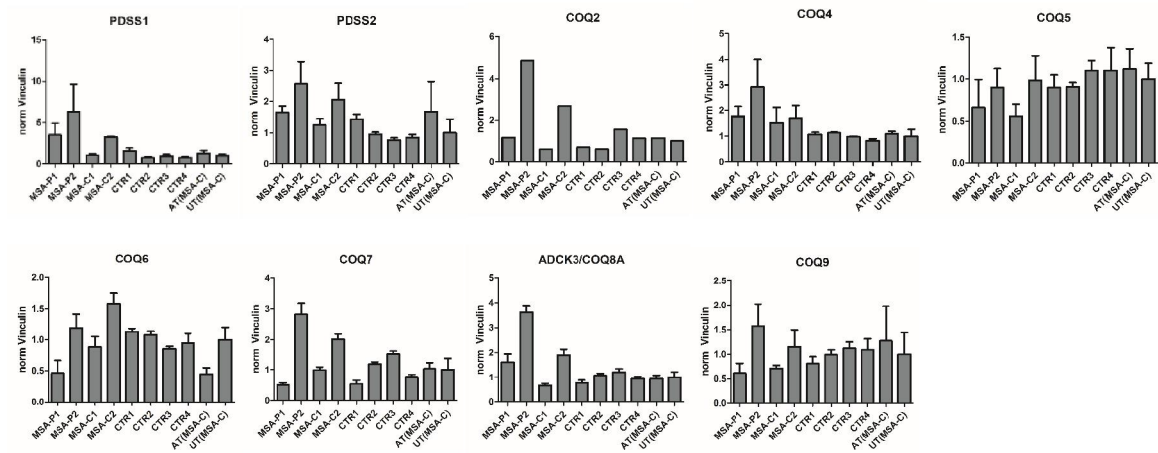

Figure S7. Related to Figure 6.

Mitochondria-related experiments (mtDNA content, CoQ10 amount, CoQ10 biosynthesis enzymes WB), showing the results for each clone.



|               | <b>DAPI/TUJ1 35 DIV</b> | <b>TUJ1/TH 35 DIV</b> | <b>DAPI/MAP2 50 DIV</b> |
|---------------|-------------------------|-----------------------|-------------------------|
| <b>MSA-P1</b> | 91 %                    | 83 %                  | 87 %                    |
| <b>MSA-P2</b> | 87 %                    | 55 %                  | 88 %                    |
| <b>MSA-C1</b> | 94 %                    | 70 %                  | 88 %                    |
| <b>MSA-C2</b> | 88 %                    | 86 %                  | 90 %                    |
| <b>CTR1</b>   | 92 %                    | 81 %                  | 84 %                    |
| <b>CTR2</b>   | 96 %                    | 78 %                  | 89 %                    |
| <b>CTR3</b>   | 89 %                    | 94 %                  | 87 %                    |
| <b>CTR4</b>   | 92 %                    | 92 %                  | 84 %                    |
| <b>UT</b>     | 86 %                    | 70 %                  | 84 %                    |

Table S1. Related to Figure 2.

Percentage of DAPI/TUJ1 co-staining and TUJ1/TH co-staining at 35 DIV and of DAPI/MAP2 co-staining at 50 DIV in iPSC-derived neurons.

|                 | <b>% aqueous phase of total sphingolipids</b> |
|-----------------|-----------------------------------------------|
| <b>P2 D35</b>   | 22,18                                         |
| <b>P2 D70</b>   | 18,67                                         |
| <b>C2 D35</b>   | 22,33                                         |
| <b>C2 D70</b>   | 16,17                                         |
| <b>ctrl D35</b> | 18,57                                         |
| <b>ctrl D70</b> | 20,57                                         |

Table S2. Related to Figure 3.

Radioactivity associated with the aqueous phases expressed as % of the total radioactivity associated with sphingolipid composition of iPSC-derived neurons.

|                 | <b>GM3</b> | <b>GM2</b> | <b>GM1</b> | <b>GD3</b> | <b>GD1a</b> | <b>GD1b</b> | <b>GT1b</b> | <b>GQ1b</b> |
|-----------------|------------|------------|------------|------------|-------------|-------------|-------------|-------------|
| <b>P2 D35</b>   | 0,147      | 0,120      | 0,179      | 0,600      | 0,458       | 0,208       | 0,232       | 0,030       |
| <b>P2 D70</b>   | 0,045      | 0,106      | 0,208      | 0,313      | 0,498       | 0,165       | 0,219       | 0,025       |
| <b>C2 D35</b>   | 0,081      | 0,056      | 0,165      | 0,661      | 0,395       | 0,221       | 0,236       | 0,045       |
| <b>C2 D70</b>   | 0,061      | 0,099      | 0,161      | 0,471      | 0,391       | 0,156       | 0,178       | 0,024       |
| <b>ctrl D35</b> | 0,191      | 0,188      | 0,374      | 0,783      | 0,606       | 0,257       | 0,293       | 0,034       |
| <b>ctrl D70</b> | 0,311      | 0,135      | 0,150      | 0,393      | 0,444       | 0,173       | 0,155       | 0,030       |

Table S3. Related to Figure 3.

Radioactivity expressed as nCi/mg of cellular proteins associated with mono- and poly-gangliosides.

| Antibody                                               | Manufacturer           | Code        | Dilution |
|--------------------------------------------------------|------------------------|-------------|----------|
| Pluripotent Stem Cell 4-Marker Immunocytochemistry Kit | Thermo Fisher          | A24881      | 1:100    |
| TUJ1                                                   | Abcam                  | ab18207     | 1:250    |
| TH                                                     | R&D Systems            | MAB7566     | 20 µg/ml |
| TH                                                     | Thermo Scientific      | PA5-17800   | 1:100    |
| GIRK2                                                  | Abcam                  | ab65096     | 1:100    |
| MAP2                                                   | Sigma-Aldrich          | M9942       | 1:100    |
| Alexa 488 anti-mouse                                   | Life Technologies      | A11001      | 1:500    |
| Alexa 488 anti-goat                                    | Jackson ImmunoResearch | 705-545-003 | 1:500    |
| Alexa 488 anti-rabbit                                  | Life Technologies      | A11034      | 1:500    |
| Alexa 568 anti-mouse                                   | Life Technologies      | A11004      | 1:500    |
| Alexa 568 anti-rabbit                                  | Life Technologies      | A11011      | 1:500    |

Table S4. Related to Experimental Procedures.

Primary and secondary antibodies used for ICC

| Antibody                                                                       | Manufacturer                 | Code          | Dilution |
|--------------------------------------------------------------------------------|------------------------------|---------------|----------|
| TUJ1                                                                           | Sigma                        | T8660         | 1:1000   |
| Alpha-synuclein                                                                | BD transduction laboratories | 610787        | 1:1000   |
| LAMP1                                                                          | Abcam                        | ab25630       | 1:875    |
| P62                                                                            | Millipore                    | MABN130       | 1:1200   |
| LC3                                                                            | Cell Signaling               | 2775          | 1:1000   |
| TOMM20                                                                         | Sigma                        | HPA011562     | 1:750    |
| OXPHOS (containing antibodies detecting NDUFB8, SDHB, UQCRC2, MTCO2 and ATP5A) | Abcam                        | ab110411      | 1:1000   |
| SDHA                                                                           | Invitrogen                   | 459200        | 1:1000   |
| TAU                                                                            | Cell Signaling               | 4019          | 1:1000   |
| Synaptophysin                                                                  | Synaptic System              | 101011        | 1:5000   |
| Synapsin I                                                                     | Synaptic System              | 106103        | 1:2000   |
| Synapsin III                                                                   | Synaptic System              | 106303        | 1:2000   |
| ADCK3/CABC1                                                                    | Thermo Scientific            | PA5-13906     | 1:1000   |
| PDSS1                                                                          | Sigma                        | AV46195       | 1:1000   |
| PDSS2                                                                          | Abcam                        | ab88817       | 1:1000   |
| COQ2                                                                           | Abnova                       | H00027235-M03 | 1:1000   |
| COQ4                                                                           | Abcam                        | ab167182      | 1:1000   |
| COQ5                                                                           | Thermo Scientific            | PA5-26327     | 1:1000   |
| COQ6                                                                           | Abcam                        | ab128652      | 1:1000   |
| COQ7                                                                           | Thermo Scientific            | PA5-25774     | 1:1000   |
| COQ9                                                                           | Thermo Scientific            | PA5-24816     | 1:1000   |
| Actin                                                                          | Sigma                        | A2066         | 1:1200   |
| Vinculin                                                                       | Abcam                        | ab18058       | 1:5000   |
| GAPDH                                                                          | Sigma-Aldrich                | G8795         | 1:5000   |
| Secondary mouse HRP                                                            | Dako                         | P0260         | 1:3200   |
| Secondary rabbit HRP                                                           | Dako                         | P0217         | 1:2700   |
| Secondary goat HRP                                                             | Dako                         | P0160         | 1:4000   |
| Secondary mouse HRP                                                            | Sigma                        | A0545         | 1:2000   |
| Secondary rabbit HRP                                                           | Sigma                        | A9044         | 1:2000   |

Table S5. Related to Experimental Procedures.

Primary and secondary antibodies used for WB

| Gene                       | Code / probe sequence / primer sequence |
|----------------------------|-----------------------------------------|
| <i>OCT4</i> assay          | Hs01895061                              |
| <i>NANOG</i> assay         | Hs02387400                              |
| <i>TUBB3</i> assay         | Hs00801390                              |
| <i>MAP2</i> assay          | Hs00258900                              |
| <i>MAPT</i> assay          | Hs00902192                              |
| <i>MAPT</i> assay          | Hs00902312                              |
| <i>I8S</i> assay           | Hs99999901                              |
| <i>GAPDH</i> assay         | Hs99999905                              |
| <i>TH</i> forward primer   | CGGGCTTCTCGGACCAGGTGTA                  |
| <i>TH</i> reverse primer   | CTCCTCGGCGGTGTACTCCACA                  |
| <i>I8S</i> forward primer  | GCTTAATTTGACTCAACACGGGA                 |
| <i>I8S</i> reverse primer  | AGCTATCAATCTGTCAATCCTGTC                |
| <i>ACTB</i> forward primer | ACGGCTCCGGCATGTGCAAG                    |
| <i>ACTB</i> reverse primer | TGACGATGCCGTGCTCGATG                    |
| <i>CYTB</i> forward primer | GCCTGCCTGATCCTCCAAAT                    |
| <i>CYTB</i> reverse primer | AAGGTAGCGGATGATTCAGCC                   |
| <i>APP</i> forward primer  | TGTGTGCTCTCCCAGGTCTA                    |
| <i>APP</i> reverse primer  | CAGTTCTGGATGGTCACTGG                    |
| <i>CYTB</i> probe          | CACCAGACGCCTCAACCGCCTT (VIC-MGB)        |
| <i>APP</i> probe           | CCCTGAACTGCAGATACCAATGTGGTAG (FAM-MGB)  |

Table S6. Related to Experimental Procedures.

TaqMan assays, probes and primers sequences used for RT-PCR

|                            | Manufacturer | Code       |
|----------------------------|--------------|------------|
| DMEM high glucose          | Euroclone    | ECM0728L   |
| Neurobasal medium          | gibco        | 21103-049  |
| Knockout Serum Replacement | gibco        | 10828-028  |
| N-2 Supplement (100X)      | gibco        | 17502-048  |
| B27 Supplement (50X)       | gibco        | 17504-001  |
| Glutamax                   | gibco        | 35050-061  |
| NEAA                       | gibco        | 11140-035  |
| Beta-mercaptoethanol       | gibco        | 31350-010  |
| Penicillin/Streptomycin    | Euroclone    | ECB3001D   |
| Amphotericin               | Euroclone    | ECM0009D   |
| Accutase                   | Euroclone    | ECB3056D   |
| cAMP                       | Sigma        | D0260      |
| BDNF                       | Peprotech    | 450-02     |
| GDNF                       | Peprotech    | 450-10     |
| TGF-beta                   | Sigma        | SRP171     |
| FGF8b                      | RD systems   | 423-F8     |
| SAG                        | Calbiochem   | 566660     |
| SB431542                   | Sigma        | 54317      |
| LDN                        | StemMACS     | LDN-193189 |
| CHIR 99021                 | Sigma        | SML1046    |
| Purmorphamine              | Calbiochem   | 540220     |
| Ascorbic acid              | Sigma        | A92902     |

Table S7. Related to Experimental Procedures.

Reagents used for neuronal differentiation
